# Supplementary material for: Neurodegenerative Disease Treatment Drug PBT2 Breaks Intrinsic Polymyxin Resistance in Gram-Positive Bacteria
Source: MDPI journal article supplement (doi:10.3390/antibiotics11040449), 2022-03-25
Supplement: s1 [file s1]

### Supplementary Material 1:

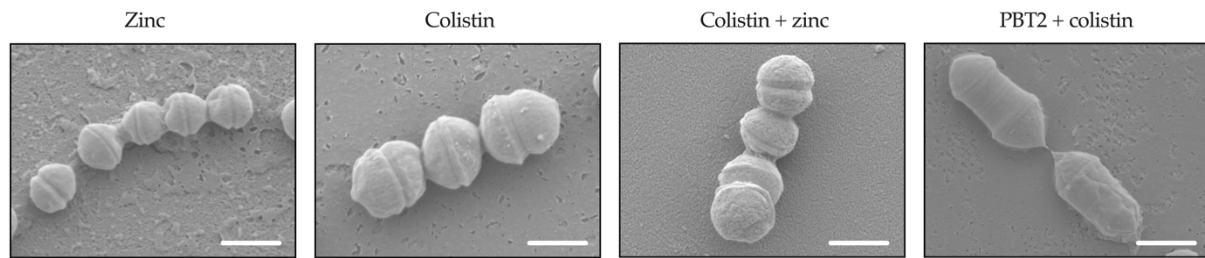

**Figure S1.** Scanning electron microscopy images of GAS strain 5448 grown in THY media, or in THY media supplemented with combinations of PBT2 (7  $\mu$ M), zinc (50  $\mu$ M), and colistin (2  $\mu$ g/mL) for 24 h at 37°C. White scale bars = 1  $\mu$ m. Arrows indicate membrane indentations and membrane ruffling.

### Supplementary Material 2:

**Table S1.** GAS 5448. Mutant chromosomal differences as identified by Illumina whole genome sequencing.

| Locus_tag    | Gene; Product                                                                                        | Position  | Mutation                |
|--------------|------------------------------------------------------------------------------------------------------|-----------|-------------------------|
| SP5448_08615 | <i>pabB</i> ; aminodeoxychorismate synthase component I                                              | 205,511   | (TGGCTG) <sub>1→2</sub> |
| SP5448_08450 | <i>pnp</i> ; polyribonucleotide nucleotidyltransferase                                               | 247,553   | +GCG                    |
| SP5448_07680 | <i>mtsR</i> ; metal dependant transcriptional regulator                                              | 390,289   | $\Delta$ 1 bp           |
| SP5448_06655 | <i>atpA</i> ; F0F1 ATP synthase subunit alpha                                                        | 596,049   | C→G                     |
| SP5448_06005 | <i>parC</i> ; DNA topoisomerase IV subunit A                                                         | 734,072   | (TCCTTC) <sub>1→2</sub> |
| SP5448_09200 | <i>cadX</i> ; Cd <sup>2+</sup> Zn <sup>2+</sup> -sensing metalloregulatory transcriptional regulator | 1,777,811 | (T) <sub>7→6</sub>      |

### Supplementary Material 3:

**Table S2.** Primers used in this study.

| GAS 5448                                                 |                                           |                           |
|----------------------------------------------------------|-------------------------------------------|---------------------------|
| Deletion mutation and reverse complementation constructs |                                           |                           |
| Primer                                                   | Sequence 5'→3'                            |                           |
| mntEKO-F1                                                | CCCGGCTCGAGAAACCAATGAACCCGTGGAG           |                           |
| mntEKO-R1                                                | CAAAGTTGGCGTATAACATATGCAATCGGATCCTGTGTCA  |                           |
| mntEKO-F2                                                | TGATATTCTCATTTTAGCCATTGCAATCGGATCCTGTGTCA |                           |
| mntEKO-R2                                                | CGCGCGAAGCTTTTTACAGCCAACAGACCGTG          |                           |
| kan-F                                                    | ATGGCTAAAATGAGAATATCA                     |                           |
| kan-R                                                    | CTAAAACAATTCATCCAGTAA                     |                           |
| Quantitative real-time PCR                               |                                           |                           |
| Gene                                                     | Primer direction                          | Sequence 5'→3'            |
| <i>czcD</i>                                              | Fwd                                       | ACCATCCATCGACCAAACAT      |
| <i>czcD</i>                                              | Rev                                       | ATTGCACTTTGCACCATGAA      |
| <i>mntE</i>                                              | Fwd                                       | CCATGATTCCCGAAGAAGAG      |
| <i>mntE</i>                                              | Rev                                       | CATTGCGATCAATCAGTTGG      |
| <i>mtsA</i>                                              | Fwd                                       | CAAACAATTGATTGCAAAGGATCC  |
| <i>mtsA</i>                                              | Rev                                       | GTCTAGTTTTTCCAATTTAGCCACA |
| <i>gyrA</i>                                              | Fwd                                       | GAAGTGATCCCTGGACCTGA      |
| <i>gyrA</i>                                              | Rev                                       | CCCGACCTGTTTGAGTTGTT      |
